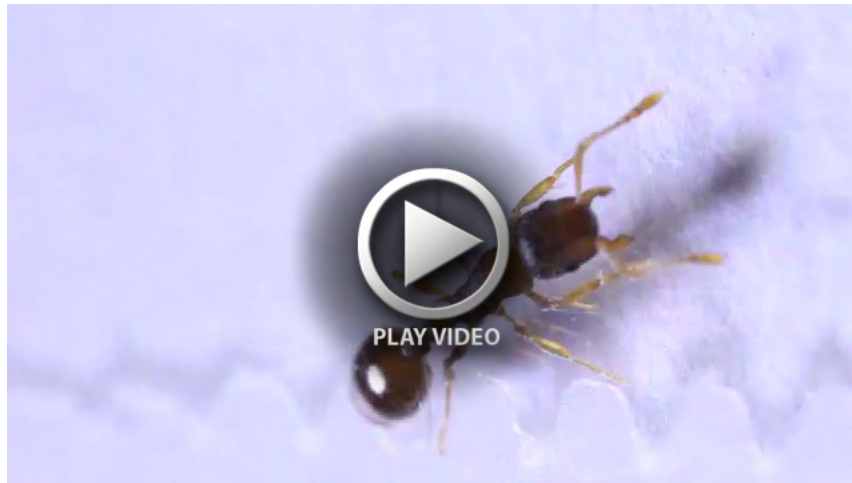

**Movie 1. Opening mandibles.** Tethered ants open mandibles, which suggests that a pheromone is released from the mandibular glands.

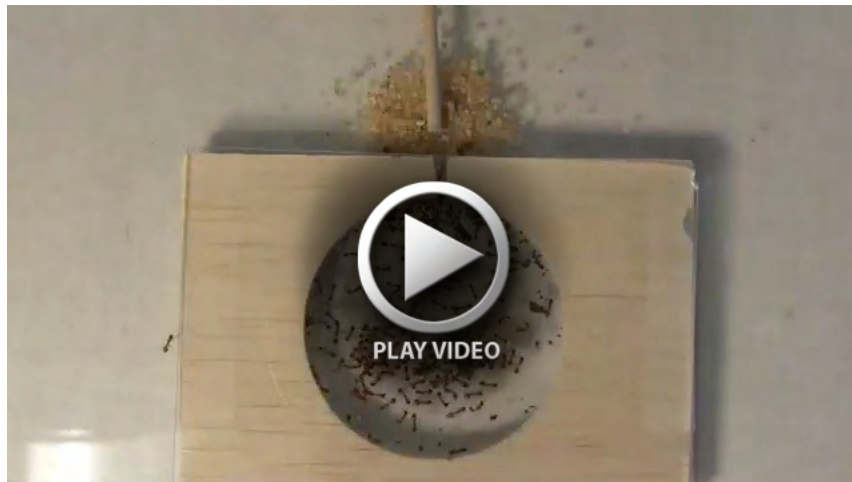

**Movie 2. Closing entrance.** When DMP and crushed heads are presented at the home nest entrance, workers come to the entrance and reduce its size using soils.
